# Supplementary material for: Transcriptome-Wide Analysis Revealed the Potential of the High-Affinity Potassium Transporter (HKT) Gene Family in Rice Salinity Tolerance via Ion Homeostasis
Source: MDPI journal article supplement (doi:10.3390/bioengineering9090410), 2022-08-23
Supplement: s1 [file s1]

# Transcriptome-Wide Analysis Revealed the Potential of the High-Affinity Potassium Transporter (*HKT*) Gene Family in Rice Salinity Tolerance via Ion Homeostasis

**Table S1.** Primers information of *OsHKT* genes for qRT-PCR expression analysis in rice.

| Genes         | Primer sequences                                      |
|---------------|-------------------------------------------------------|
| <i>OsHKT1</i> | F: TGAAGCCAAGCAACCCAGAA<br>R: AGGCTGGAAAGTGTCTCAGAGC  |
| <i>OsHKT3</i> | F: AGAGGCGACTCCCCAAACT<br>R: TGATCATGTATGCCAGCACCA    |
| <i>OsHKT4</i> | F: GGTGCCTCGGATCTATTGGG<br>R: TCAGAGCAAGGAAACCAGCA    |
| <i>OsHKT6</i> | F: GTCCTCAAGCCACGAGACAA<br>R: CCAGAGTTGAGCGCTTGAGA    |
| <i>OsHKT7</i> | F: ACCAGGGAATCAGACTGCTC<br>R: CCATATGCACTGACAACTTCGAC |
| <i>OsHKT8</i> | F: CACCCATTCTGGCTCCAACT<br>R: ATCGGCAGAGCTTTCAGCAT    |
| <i>OsHKT9</i> | F: AGTGCCTACGGGAACATTGG<br>R: CACCCCGAGAAGCTGTATGG    |
